# Supplementary material
Source: Springer Nature journal article supplement (https://www.springermedizin.de/resource/supplementary/12885_2013_4394_MOESM7_ESM.pdf/9466188)

A

## A253 Cells

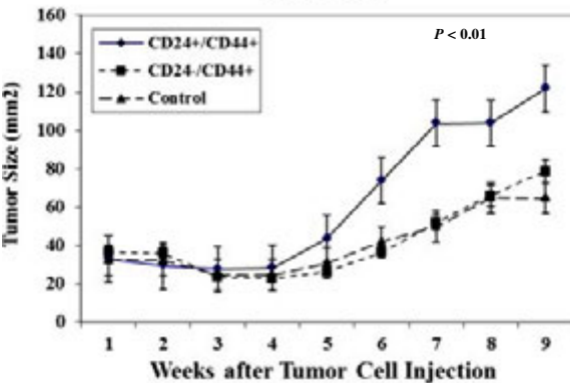

B

## KCCT873 Cells

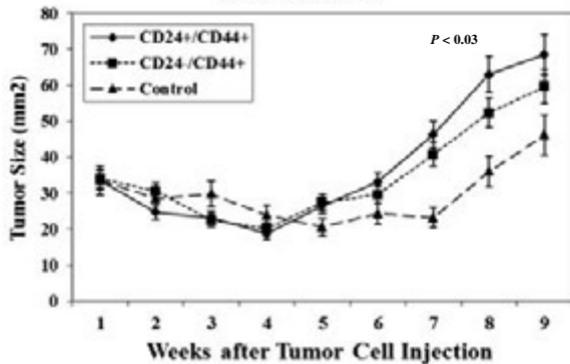

Supplement: MOESM7 [file 9466188]
